# Supplementary material
Source: ML conference proceedings conference paper supplement (https://proceedings.neurips.cc/paper_files/paper/2019/hash/f2d887e01a80e813d9080038decbbabb-Abstract.html)
Supplement: Supplementary file [file f2d887e01a80e813d9080038decbbabb-Supplemental.zip]

## A Maintaining log-submodularity in the generative model

**Theorem 1.** Let  $f$  be a strictly submodular function over subsets of a ground set  $\mathcal{Y}$ , and  $g$  be a function over the same space such that

$$\|f - g\|_\infty \leq \min_{\substack{S \neq T \\ S, T \notin \{\emptyset, \mathcal{Y}\}}} \frac{1}{4} [f(S) + f(T) - f(S \cup T) - f(S \cap T)]. \quad (4)$$

Then  $g$  is also submodular.

*Proof.* In all the following, we assume that  $S, T$  are subsets of a ground set  $\mathcal{Y}$  such that  $S \neq T$  and  $S, T \notin \{\emptyset, \mathcal{Y}\}$  (the inequalities being immediate in these corner cases). Let

$$\epsilon := \min_{S, T} f(S) + f(T) - f(S \cup T) - f(S \cap T)$$

By the strict submodularity hypothesis, we know  $\epsilon > 0$ .

Let  $S, T \subseteq \mathcal{Y}$  such that  $S \neq T$  and  $S, T \neq \emptyset, \mathcal{Y}$ . To show the log-submodularity of  $g$ , it suffices to show that

$$g(S) + g(T) \geq g(S \cup T) + g(S \cap T).$$

By definition of  $\epsilon$ ,

$$f(S) + f(T) - f(S \cup T) - f(S \cap T) \geq \epsilon$$

From equation 4, we know that

$$\max_{S \subseteq \mathcal{Y}} |f(S) - g(S)| \leq \epsilon/4.$$

It follows that

$$\begin{aligned} g(S) + g(T) - g(S \cup T) - g(S \cap T) &\geq f(S) + f(T) - f(S \cup T) - f(S \cap T) - \epsilon \\ &\geq 0 \end{aligned}$$

which proves the submodularity of  $g$ .  $\square$

## B Encoder details

For the MNIST encodings, the VAE encoder consists of a 2d-convolutional layer with 64 filters of height and width 4 and strides of 2, followed by a 2d convolution layer with 128 filters (same height, width and strides), then by a dense layer of 1024 neurons. The encodings are of length 32.

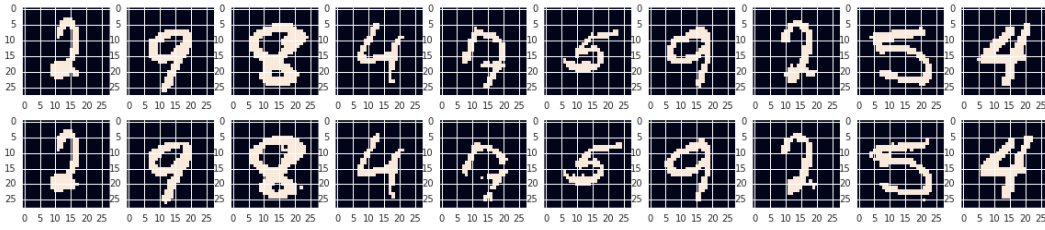

Figure 6: Digits and VAE reconstructions from the MNIST training set

CelebA encodings were generated by a VAE using a Wide Residual Network [47] encoder with 10 layers and filter-multiplier  $k = 4$ , a latent space of 32 full-covariance Gaussians, and a deconvolutional decoder trained end-to-end using an ELBO loss. In detail, the decoder architecture consists of a 16K dense layer followed by a sequence of  $4 \times 4$  convolutions with [512, 256, 128, 64] filters interleaved with  $2 \times$  upsampling layers and a final  $6 \times 6$  convolution with 3 output channels for each of 5 components in a mixture of quantized logistic distributions representing the decoded image.
